# Supplementary material for: Synthesis of a fluorescent probe based on rhodol's highly selective recognition of H2S and its application in cells
Source: Royal Society of Chemistry journal article supplement (doi:10.1039/d4ay01643b), 2024-11-08
Supplement: d4ay01643b1.pdf [file d4ay01643b1.pdf]

# Supporting Information

## Synthesis of a fluorescent probe based on Rhodol's highly selective recognition of H<sub>2</sub>S and its application in cells

### Contents

|                                                                                   |    |
|-----------------------------------------------------------------------------------|----|
| Materials and Instruments .....                                                   | 1  |
| Methods for synthesis of compounds <b>TF-1</b> .....                              | 1  |
| Methods for synthesis of compounds <b>TF-2</b> .....                              | 4  |
| Methods for synthesis of compounds <b>TF-3</b> .....                              | 6  |
| Mechanistic studies .....                                                         | 9  |
| Comparison with other reported probes for determination of H <sub>2</sub> S ..... | 12 |

### Materials and Instruments

Phthalic anhydride (99.7%), m-hydroxy-N,N-diethylbenzeneamine (95%), catechol (99%), and 2-chloro-1,4-naphthoquinone (98%) along with other analytical reagents were commercially obtained and used as received. NMR data were collected using CDCl<sub>3</sub> as solvents on a 600 MHz NMR spectrometer, with high-resolution mass spectra (HR-MS) measured at 298K on a WNMRI-500MHz spectrometer. UV-visible absorption spectra were recorded using a UV-2550 spectrophotometer (Shimadzu, Japan), and fluorescence spectra at room temperature were recorded using a Cary Eclipse fluorescence spectrometer (Agilent Technologies, USA), with an excitation wavelength set at 490 nm. The cytotoxic effects of compound **TF-1** on cells were determined using the CCK-8 assay. The excitation and emission wavelength band passes were set at 1 nm and 2.5 nm, excitation voltage was 700 V.

### Methods for synthesis of compounds **TF-1**

Weigh m-hydroxy-N,N-diethylbenzeneamine (1.65 g, 10 mmol) and phthalic anhydride (1.48 g, 10 mmol), first dissolve the phthalic anhydride in toluene, and react at 80°C for 30 minutes. After 30 minutes, add m-hydroxy-N,N-dimethylbenzeneamine and heat to 110°C for a further 8 hours. Monitor the reaction by TLC. Upon completion, remove the solvent by rotary evaporation and recrystallize from n-butanol. Purify the intermediate 2-(4-Diethylamino-2-hydroxybenzoyl)benzoic acid (86% yield) via column chromatography. Weigh intermediate 2-(4-Diethylamino-2-hydroxybenzoyl)benzoic acid (1.56 g, 5 mmol) and catec

hol (0.55 g, 5 mmol), dissolve in 5 mL of trifluoroacetic acid, and reflux at 80°C for 12 hours. Monitor the reaction by TLC. After completion, remove the solvent by rotary evaporation and recrystallize using ethyl acetate. Purify the compound to obtain intermediate ROA-H (80% yield). Weigh the obtained intermediate ROA-H (193.7 mg, 0.5 mmol) and 2-chloro-1,4-naphthoquinone (96.3 mg, 0.5 mmol), dissolve in 8 mL of DMSO under nitrogen protection, and react at room temperature for 12 hours. Monitor the progress of the reaction by TLC. After completion, extract with ethyl acetate and saturated salt water, collect the organic phase, dry over anhydrous sodium sulfate, and reduce the pressure to dry the solvent, obtaining a crude product. Purify the crude product via column chromatography, using a mobile phase system of dichloromethane to methanol 100:1. The product is a brown solid, namely the fluorescent probe **TF-1**, with a yield of 74.3%. ESI-MS  $m/z$  calcd for  $C_{34}H_{25}NO_6$   $[M+H]^+$  544.1755, found 544.1768.

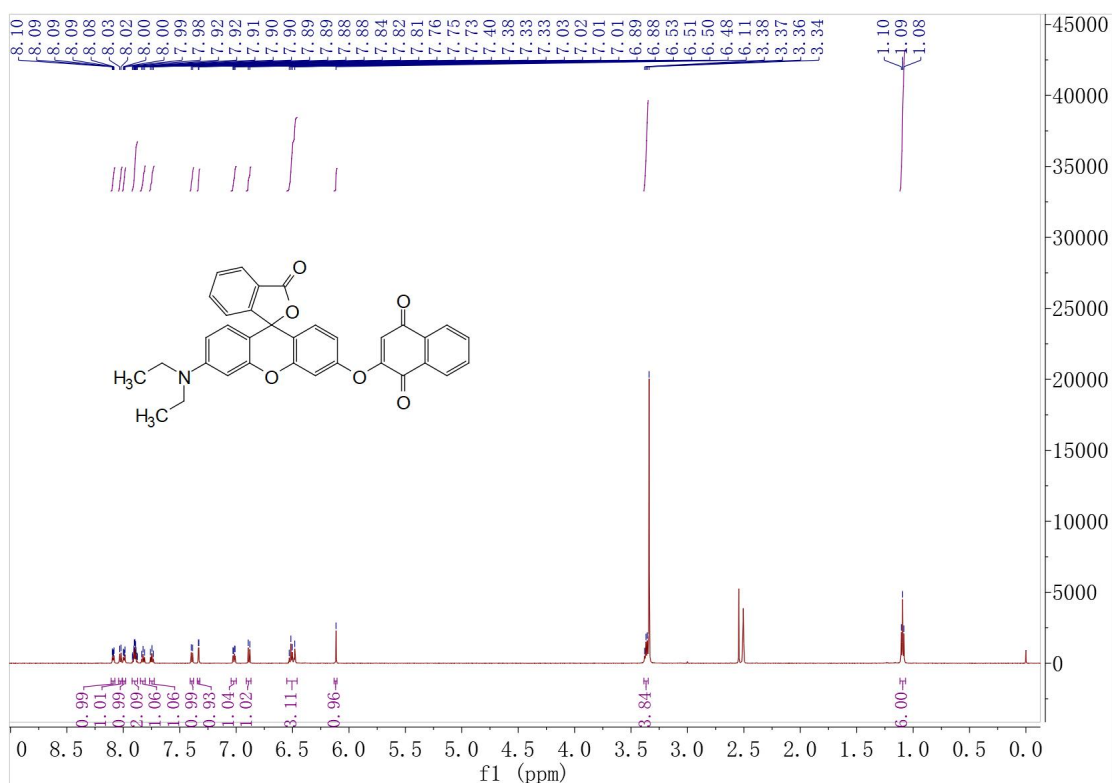

Fig. S1. <sup>1</sup>H NMR of compound **TF-1** in DMSO-*d*<sub>6</sub>

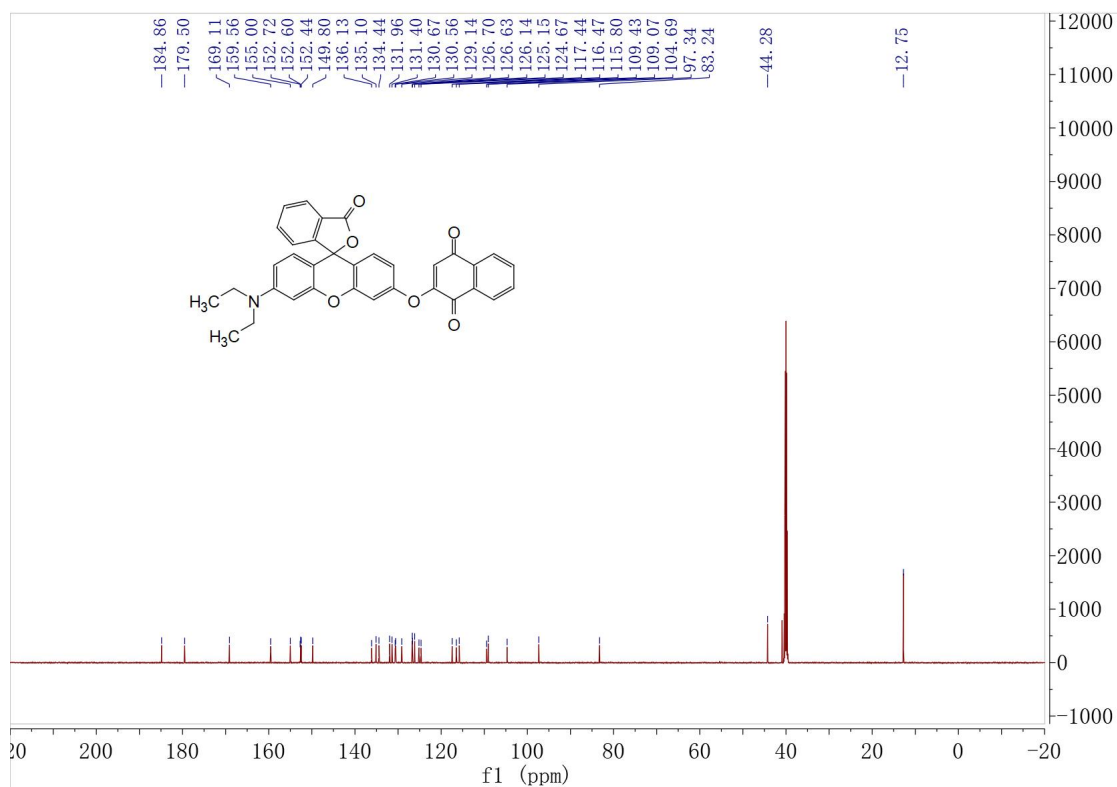

Fig. S2.  $^{13}\text{C}$  NMR of compound TF-1 in  $\text{DMSO-}d_6$

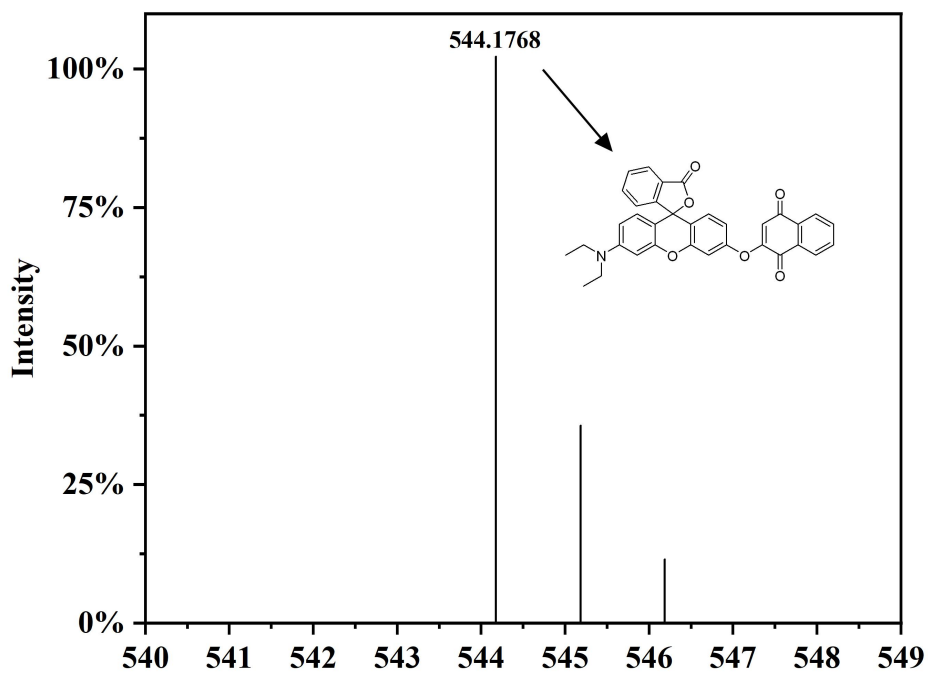

Fig. S3. High-resolution mass spectrometry of probe TF-1

## Methods for synthesis of compounds TF-2

Weigh 1.65 g (10 mmol) of meta-hydroxy-N,N-diethyl-aniline and 1.48 g (10 mmol) of phthalic anhydride. Dissolve the phthalic anhydride in toluene and react at 80°C for 30 minutes. After 30 minutes, add meta-hydroxy-N,N-dimethyl-aniline and heat to 110°C for an additional 8 hours, monitoring the reaction by thin-layer chromatography (TLC). After completion, remove the solvent by rotary evaporation and recrystallize from n-butanol. Purify the intermediate, 2-(4-diethylamino-2-hydroxybenzoyl)benzoic acid, by column chromatography (yield 86%). Weigh 1.56 g (5 mmol) of the intermediate, 2-(4-diethylamino-2-hydroxybenzoyl)benzoic acid, and 0.62 g (5 mmol) of 4-methylresorcinol. Dissolve them in 5 mL of trifluoroacetic acid and reflux at 80°C for 12 hours. Monitor the reaction by TLC. After completion, remove the solvent by rotary evaporation and purify the compound by column chromatography to obtain the intermediate ROA-CH<sub>3</sub> (yield 88%). Weigh 200.7 mg (0.5 mmol) of the intermediate ROA-CH<sub>3</sub> and 96.3 mg (0.5 mmol) of 2-chloro-1,4-naphthoquinone. Dissolve them in 8 mL of DMSO under nitrogen atmosphere and react at room temperature for 12 hours. Monitor the reaction by TLC. After completion, extract with ethyl acetate and saturated brine. Collect the organic phase, dry over anhydrous sodium sulfate, and remove the solvent under reduced pressure to obtain the crude product. Purify the crude product by column chromatography using a dichloromethane and methanol mobile phase system. The product, a brown solid, is the fluorescent probe **TF-2** with a yield of 81.6%. <sup>1</sup>H NMR (600 MHz, Chloroform-*d*) δ 8.23 – 8.19 (m, 1H), 8.08 – 8.05 (m, 1H), 8.02 (d, *J* = 7.6 Hz, 1H), 7.79 – 7.74 (m, 2H), 7.70 (td, *J* = 7.6, 1.0 Hz, 1H), 7.65 – 7.60 (m, 1H), 7.26 (s, 1H), 6.73 (d, *J* = 8.7 Hz, 1H), 6.71 – 6.68 (m, 1H), 6.59 (d, *J* = 9.0 Hz, 1H), 6.49 (d, *J* = 2.6 Hz, 1H), 6.39 (dd, *J* = 9.0, 2.6 Hz, 1H), 5.86 (s, 1H), 3.38 (q, *J* = 7.0 Hz, 4H), 2.35 (s, 3H), 1.18 (t, *J* = 7.1 Hz, 6H). <sup>13</sup>C NMR (151 MHz, Chloroform-*d*) δ 184.81 , 179.62 , 169.45 , 159.29 , 152.90 , 152.70 , 151.53 , 151.30 , 149.74 , 134.97 , 134.52 , 133.61 , 131.96 , 131.11 , 129.68 , 128.80 , 127.10 , 126.81 , 126.73 , 126.30 , 125.00 , 124.16 , 118.86 , 117.83 , 115.80 , 113.24 , 108.84 , 104.65 , 97.64 , 83.90 , 44.48 , 12.54 , 9.37 . ESI-MS *m/z* calcd for C<sub>35</sub>H<sub>27</sub>NO<sub>6</sub> [M+H]<sup>+</sup> 558.1911 , found 558.1909.

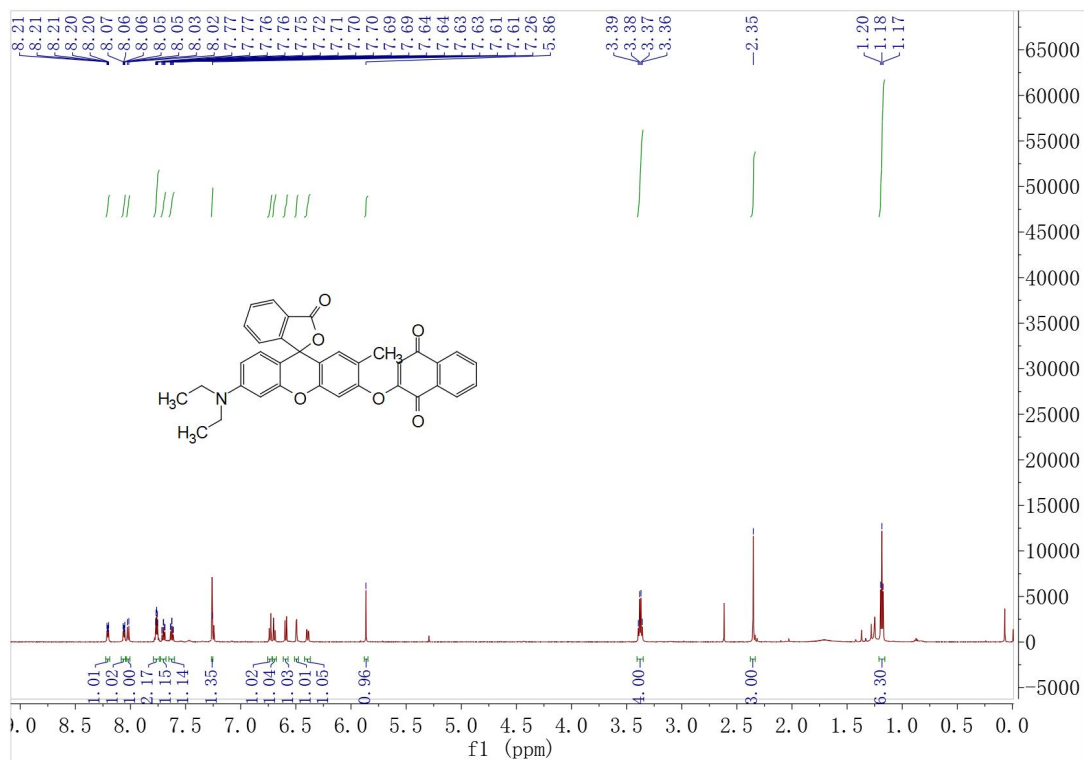

Fig. S4. <sup>1</sup>H NMR of compound TF-2 in CDCl<sub>3</sub>

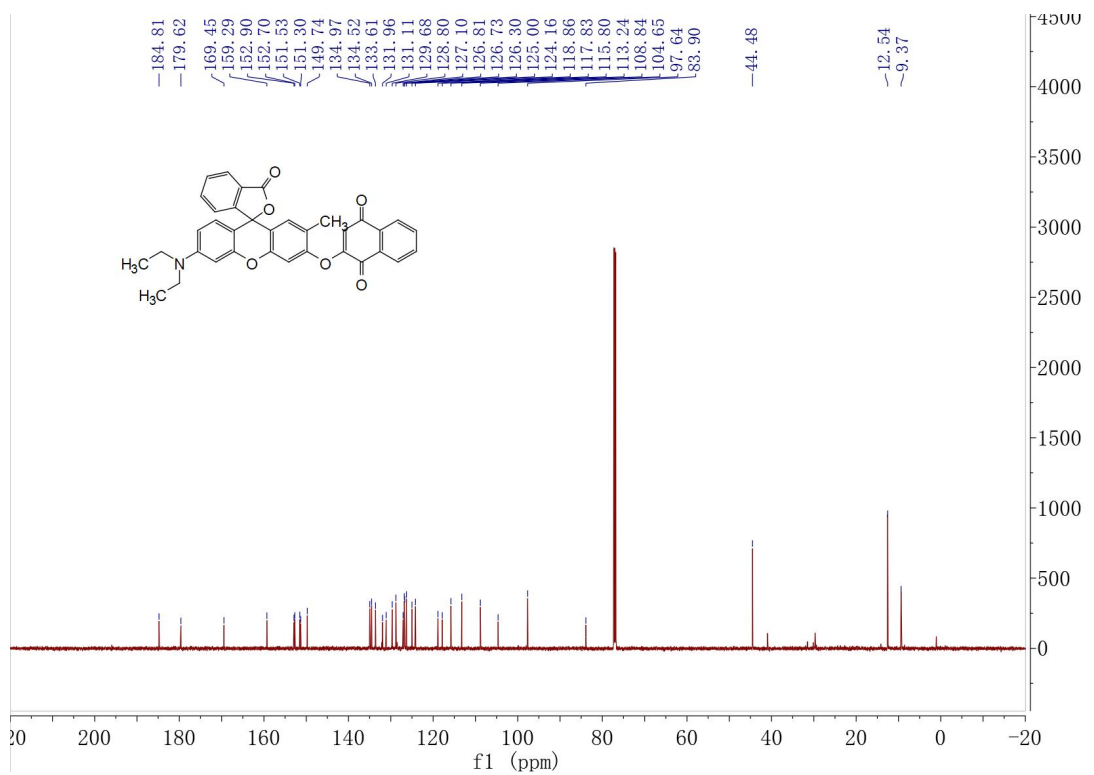

Fig. S5. <sup>13</sup>C NMR of compound TF-2 in CDCl<sub>3</sub>

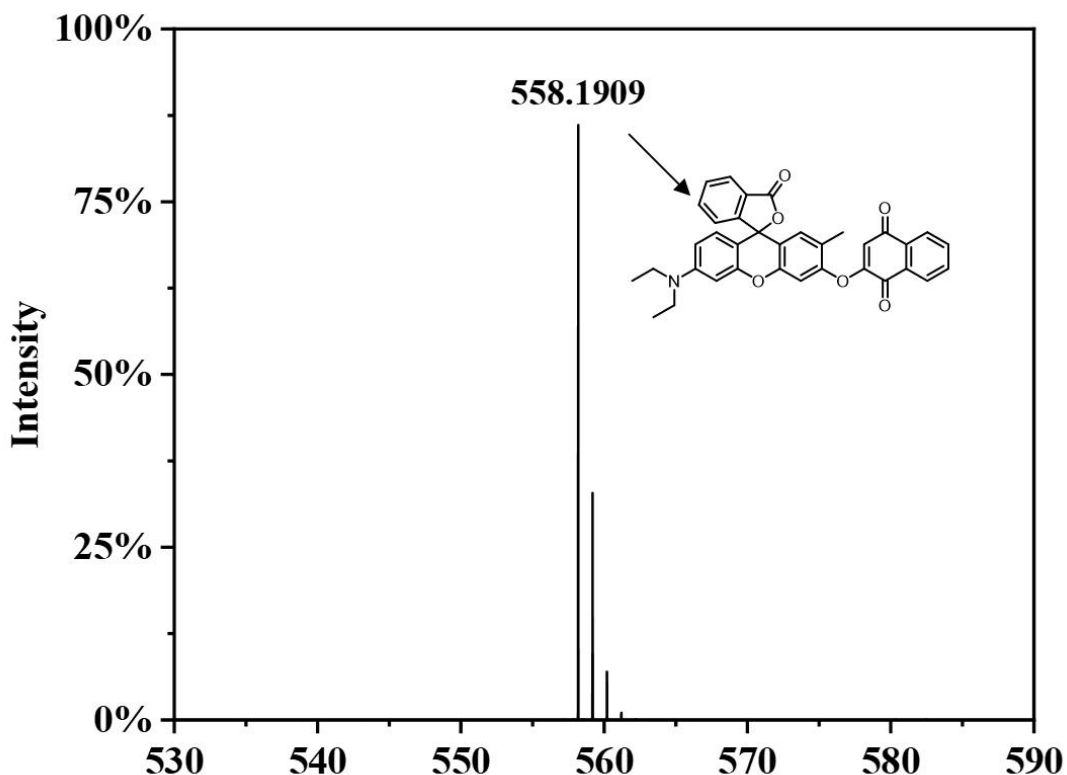

Fig. S6. High-resolution mass spectrometry of probe **TF-2**

### Methods for synthesis of compounds **TF-3**

Weigh 1.65 g (10 mmol) of meta-hydroxy-N,N-diethyl-aniline and 1.48 g (10 mmol) of phthalic anhydride. Dissolve the phthalic anhydride in toluene and react at 80°C for 30 minutes. After 30 minutes, add meta-hydroxy-N,N-diethyl-aniline and heat to 110°C for an additional 8 hours, monitoring the reaction by thin-layer chromatography (TLC). After completion, remove the solvent by rotary evaporation and recrystallize from n-butanol. Purify the intermediate, 2-(4-diethylamino-2-hydroxybenzoyl)benzoic acid, by column chromatography (yield 86%). Weigh 1.56 g (5 mmol) of the intermediate, 2-(4-diethylamino-2-hydroxybenzoyl)benzoic acid, and 0.72 g (5 mmol) of 4-chlororesorcinol. Dissolve them in 5 mL of trifluoroacetic acid and reflux at 80°C for 12 hours. Monitor the reaction by TLC. After completion, remove the solvent by rotary evaporation and purify the compound by column chromatography to obtain the intermediate ROA-Cl (yield 70.3%). Weigh 210.9 mg (0.5 mmol) of the intermediate ROA-Cl and 96.3 mg (0.5 mmol) of 2-chloro-1,4-naphthoquinone. Dissolve them in

n 8 mL of DMSO under nitrogen atmosphere and react at room temperature for 12 hours. Monitor the reaction by TLC. After completion, extract with ethyl acetate and saturated brine. Collect the organic phase, dry over anhydrous sodium sulfate, and remove the solvent under reduced pressure to obtain the crude product. Purify the crude product by column chromatography using a dichloromethane and methanol mobile phase system. The product, a brown solid, is the fluorescent probe **TF-3** with a yield of 61.6%. <sup>1</sup>H NMR (600 MHz, Chloroform-d) δ 8.23 – 8.20 (m, 1H), 8.10 – 8.04 (m, 2H), 7.80 – 7.76 (m, 2H), 7.76 – 7.72 (m, 1H), 7.67 (t, J = 7.5 Hz, 1H), 7.27 (s, 1H), 7.14 (s, 1H), 6.89 (s, 1H), 6.57 (d, J = 9.0 Hz, 1H), 6.44 (d, J = 2.5 Hz, 1H), 6.39 (dd, J = 9.0, 2.6 Hz, 1H), 5.94 (s, 1H), 3.36 (q, J = 7.1 Hz, 4H), 1.17 (t, J = 7.1 Hz, 6H). <sup>13</sup>C NMR (151 MHz, CDCl<sub>3</sub>) δ 184.58, 179.02, 169.13, 158.32, 152.37, 152.30, 151.36, 149.84, 149.47, 135.30, 134.57, 133.76, 131.89, 131.03, 130.22, 130.07, 128.84, 126.90, 126.82, 126.38, 125.26, 124.10, 120.63, 119.74, 114.10, 111.56, 109.02, 104.11, 97.50, 82.71, 44.54, 12.47. ESI-MS m/z calcd for C<sub>34</sub>H<sub>24</sub>ClNO<sub>6</sub> [M+H]<sup>+</sup> 578.1365, found 578.1351.

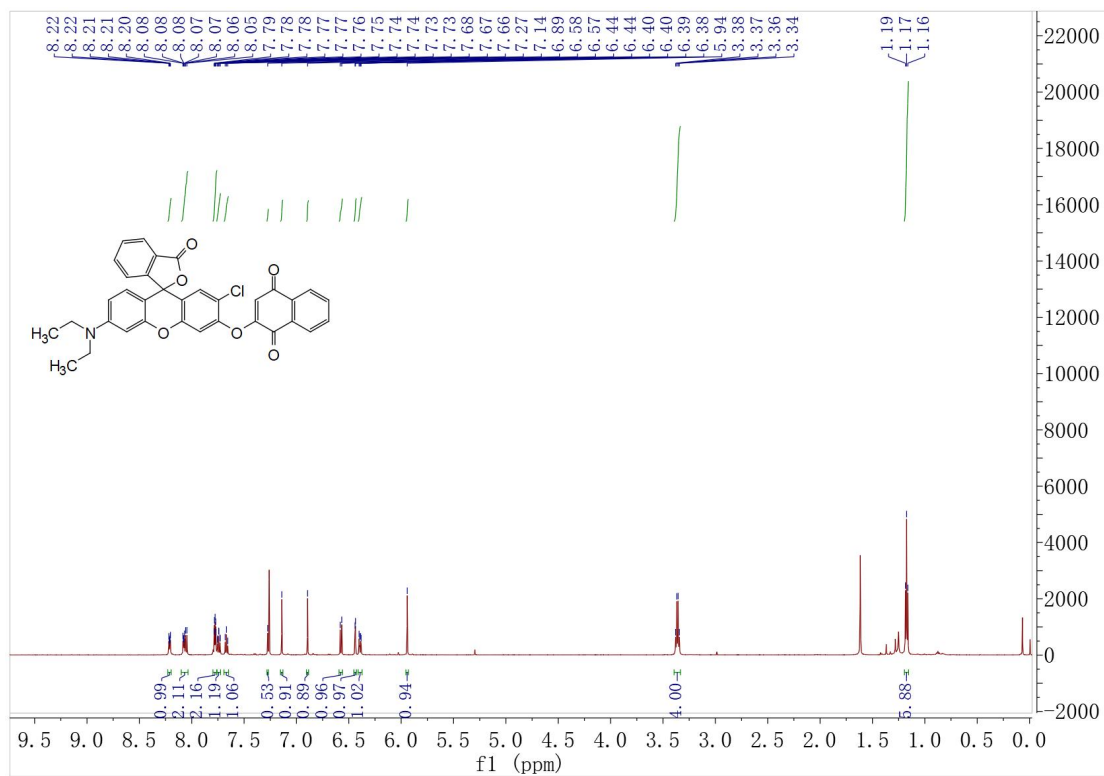

Fig. S7. <sup>1</sup>H NMR of compound TF-3 in CDCl<sub>3</sub>

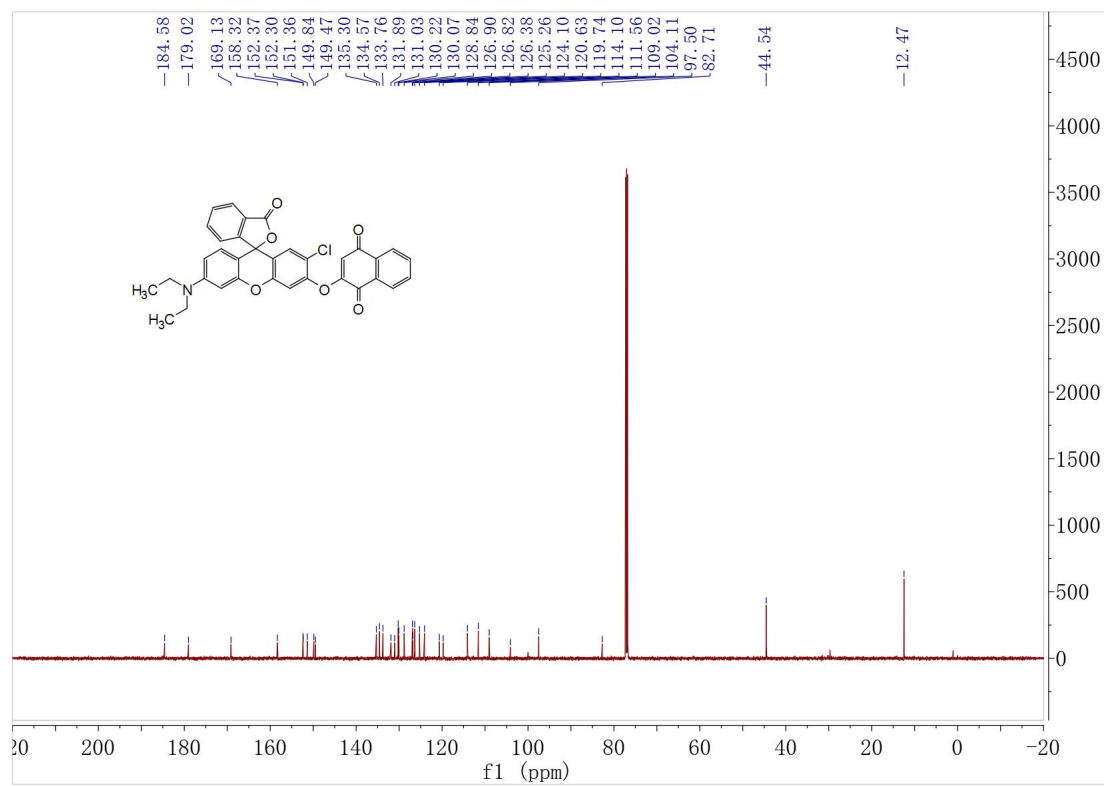

Fig. S8. <sup>13</sup>C NMR of compound TF-3 in



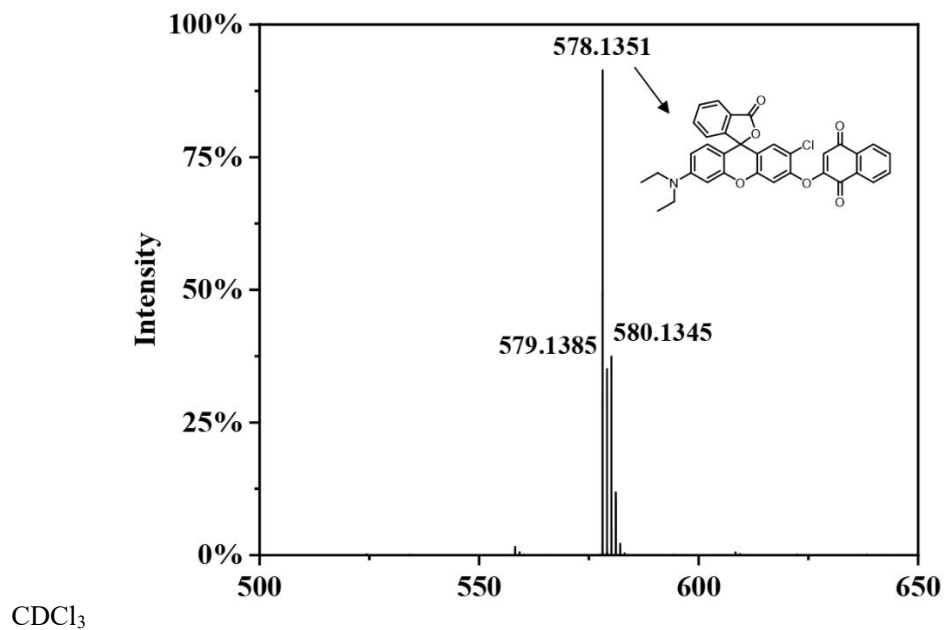

Fig. S9. High-resolution mass spectrometry of probe TF-3

### Mechanistic studies

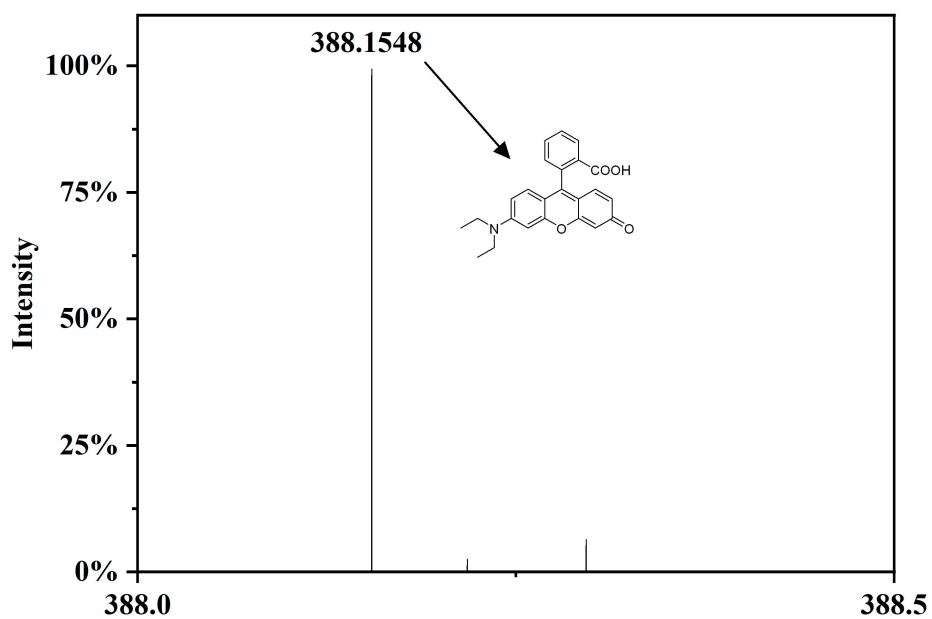

Fig. S10. High-resolution mass spectrometry of probe TF-1-HS

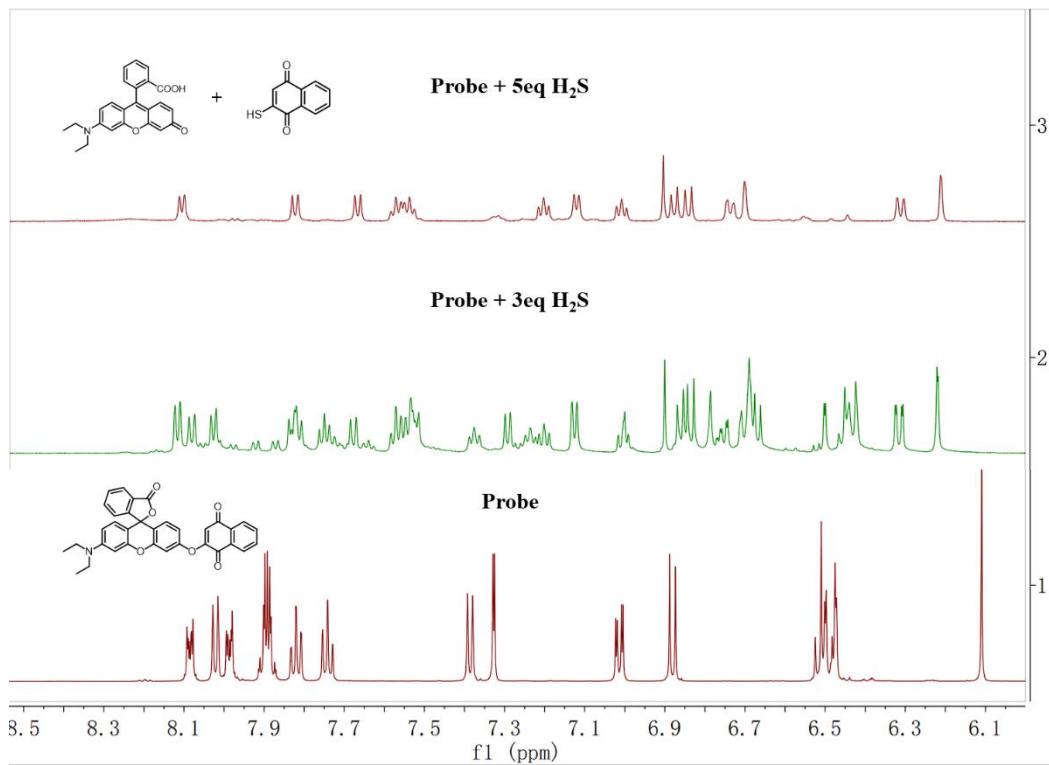

Fig. S11. <sup>1</sup>H-NMR of probe TF-1 at 0/3/5eq H<sub>2</sub>S

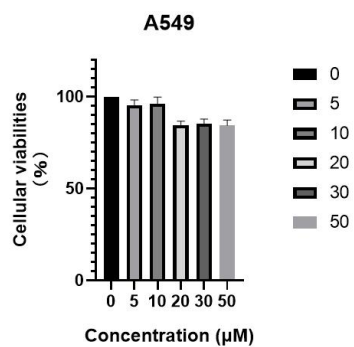

Fig.S12. Probe TF-1 for A549 cytotoxicity test

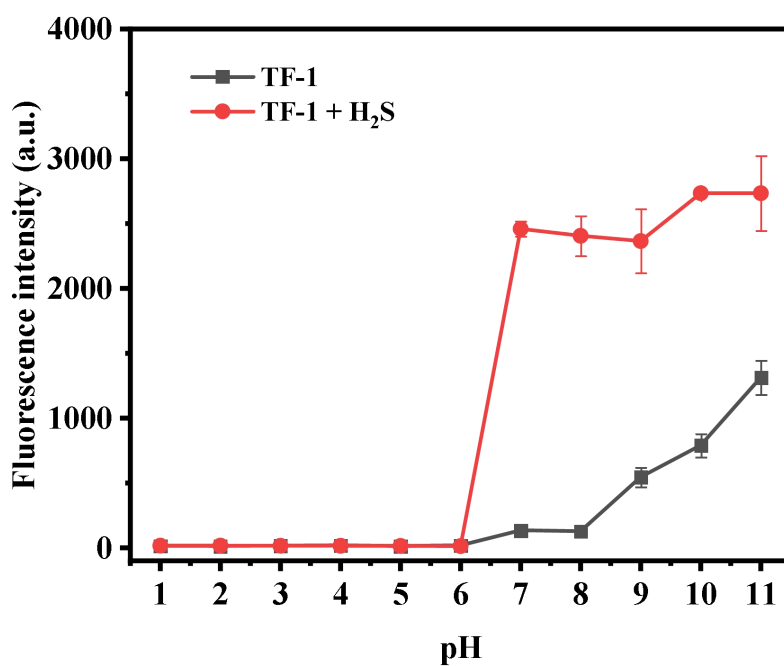

Fig.S13. Changes in fluorescence intensity of probe **TF-1** (10 $\mu$ M) before and after addition of H<sub>2</sub>S (100 $\mu$ M) at different pH

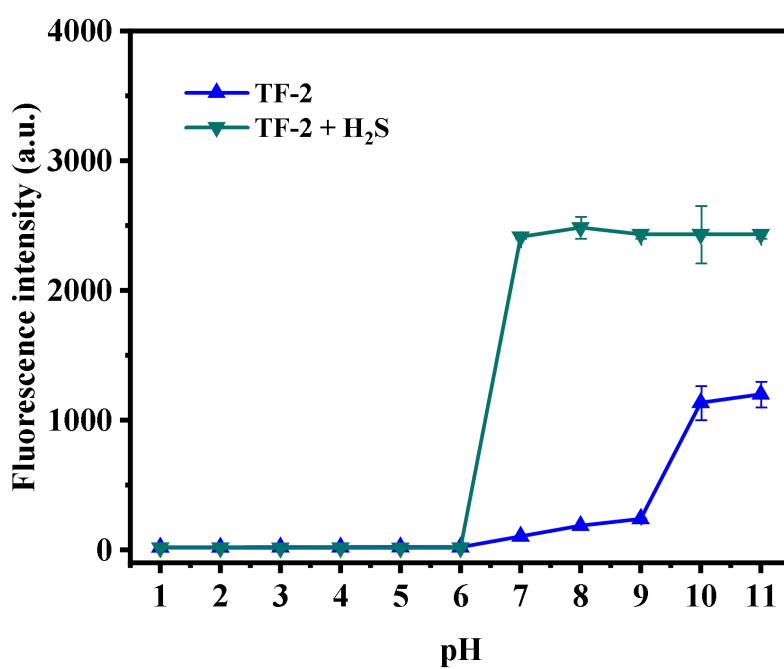

Fig.S14. Changes in probe **TF-2** (10 $\mu$ M) before and after addition of H<sub>2</sub>S (100 $\mu$ M) at different pH

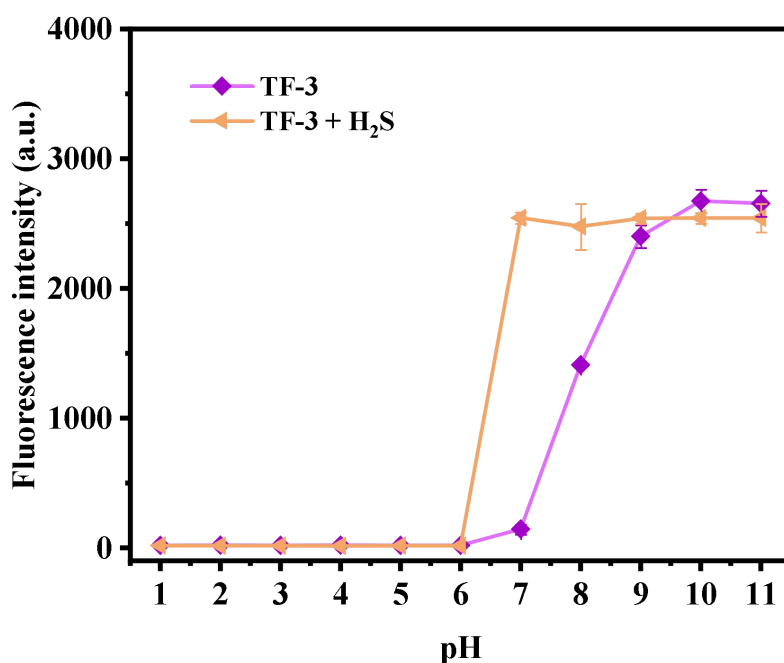

Fig.S15. The fluorescence intensity changes of probe **TF-3** (10 $\mu$ M) before and after adding H<sub>2</sub>S (100 $\mu$ M) at different pH

### Comparison with other reported probes for determination of H<sub>2</sub>S

Table S1.

| Probe                                                                               | Limit of detection (nM) | Response time (min) | Reaction media        | Practical application        | Reference                                                                             |
|-------------------------------------------------------------------------------------|-------------------------|---------------------|-----------------------|------------------------------|---------------------------------------------------------------------------------------|
| 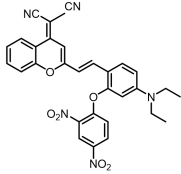 | 25.3                    | 3                   | PBS/ DMSO (9/1, v/v)  | Cell                         | Spectrochimica Acta Part A: Molecular and Biomolecular Spectroscopy 257 (2021) 119764 |
|  | 6.8                     | 300                 | PBS/ DMSO (7/3, v/v)  | Water sample and human blood | Spectrochimica Acta Part A: Molecular and Biomolecular Spectroscopy 273 (2022) 121043 |
|  | 80                      | 10                  | HEPES/DMSO (9/1, v/v) | Cell                         | Journal of Molecular Structure 1308                                                   |

(2024): 138125.

|                                                                                   |              |     |                                       |              |                                                               |
|-----------------------------------------------------------------------------------|--------------|-----|---------------------------------------|--------------|---------------------------------------------------------------|
| 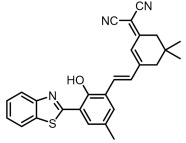 | 28.3 $\mu$ M | 0.2 | CH <sub>3</sub> CN/PBS<br>(1/1, v/v)  | Cell         | Microchemical<br>Journal,(2024)<br>111143.                    |
|  | 90           | 120 | PBS/ DMSO<br>(95/5, v/v)              | Cell         | Sensors and<br>Actuators: B.<br>Chemical 369<br>(2022) 132297 |
|  | 10           | 60  | PBS/ DMSO<br>(2/3, v/v)               | Water sample | Microchemical<br>Journal 191 (2023)<br>108856                 |
|  | 31.8         | <1  | CH <sub>3</sub> CN/ PBS<br>(4/1, v/v) | Cell         | This work                                                     |
