# Supplementary figures and images for: Synthesis of a fluorescent probe based on rhodol's highly selective recognition of H2S and its application in cells
Source: Royal Society of Chemistry journal article supplement (doi:10.1039/d4ay01643b), 2024-11-08

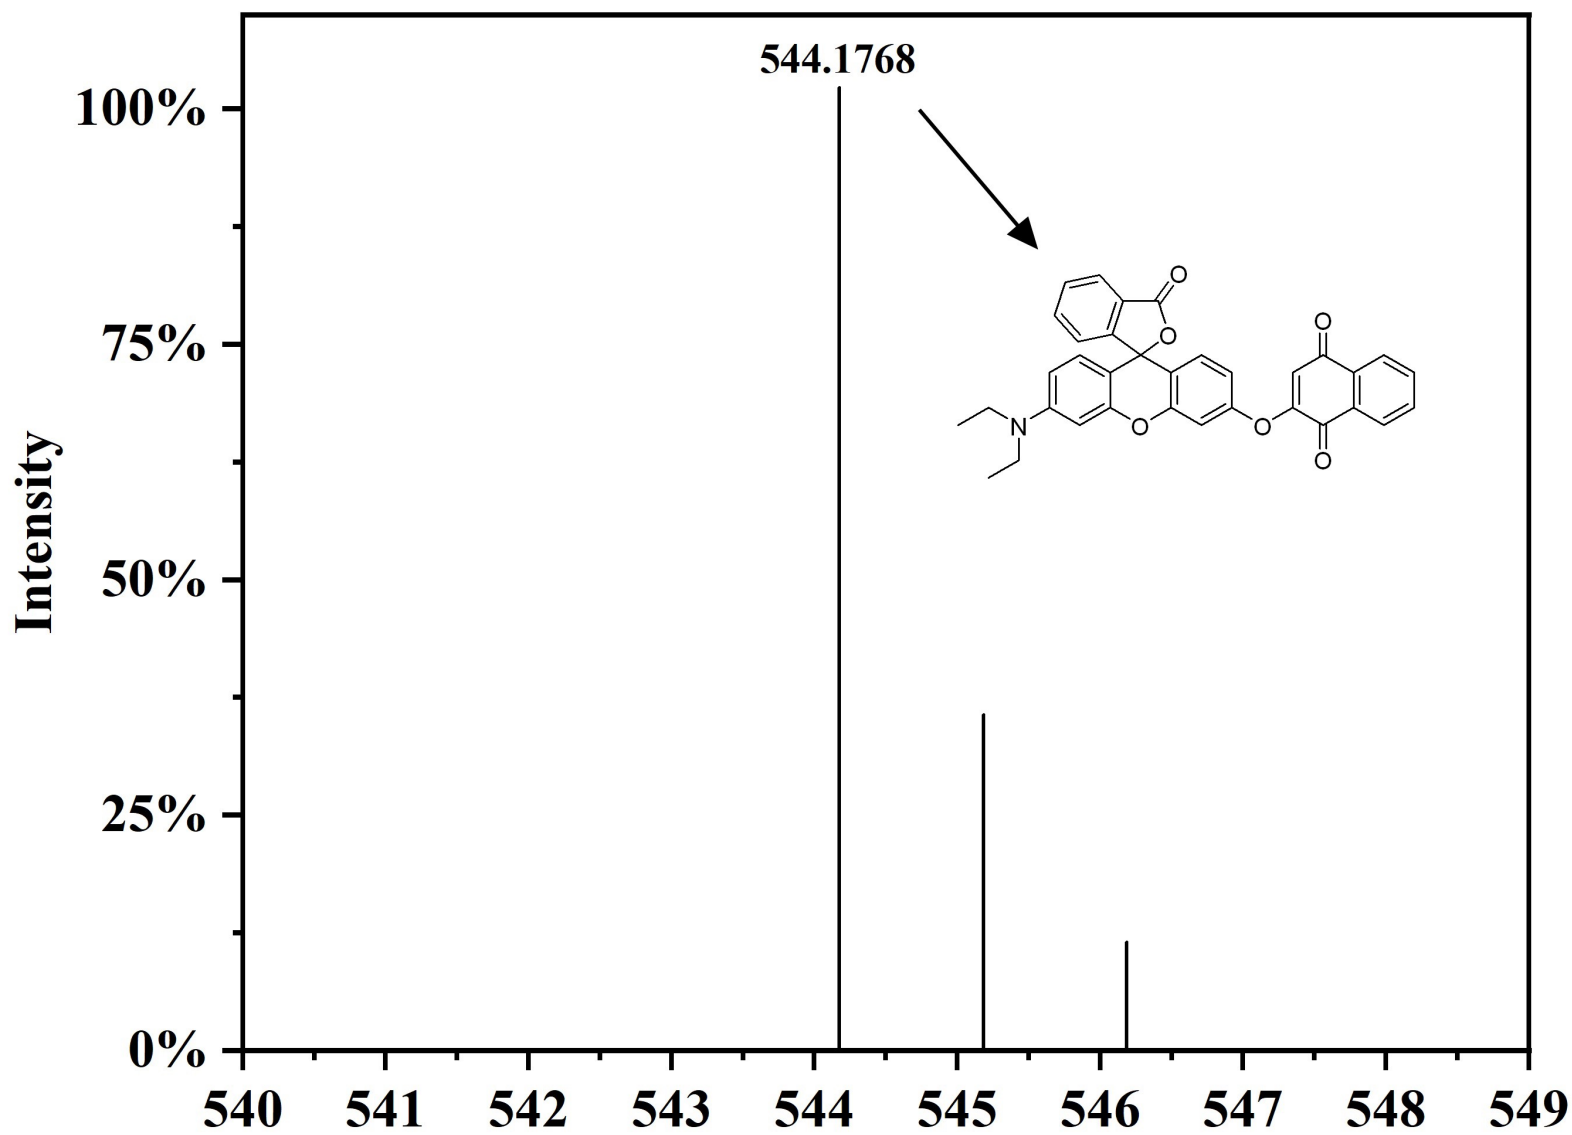

Supplement: d4ay01643b2.pdf [file d4ay01643b2.pdf]
